# Supplementary material for: Towards a more detailed representation of high-latitudevegetation in the global land surface model ORCHIDEE(ORC-HL-VEGv1.0)
Source: Copernicus journal article supplement (doi:10.5194/gmd-2017-65), 2017-03-28
Supplement: Supplementary file 1 [file gmd-2017-65-supplement.pdf]

**Table S1: Conversion table use to obtained vegetation coverage map from the ESA CCI LCC map.**

| ID | CCI ESA<br>Land Cover Class Description                   | Trees |    |    |    | Shrub |    |     |    | Herbaceous |       | NVPs | Non-vegetated |       |          |       |         |
|----|-----------------------------------------------------------|-------|----|----|----|-------|----|-----|----|------------|-------|------|---------------|-------|----------|-------|---------|
|    |                                                           | BE    | BD | NE | ND | BE    | BD | NE  | ND | Natural    | Crops |      | Bare soil     | Water | Snow/Ice | Urban | No data |
| 0  | No data                                                   |       |    |    |    |       |    |     |    |            |       |      |               |       |          |       | 100     |
| 10 | Cropland, rainfed                                         |       |    |    |    |       |    |     |    |            | 100   |      |               |       |          |       |         |
| 11 | Herbaceous cover                                          |       |    |    |    |       |    |     |    |            | 100   |      |               |       |          |       |         |
| 12 | Tree or shrub cover                                       |       |    |    |    |       | 50 |     |    |            | 50    |      |               |       |          |       |         |
| 20 | Cropland, irrigated or post-flooding                      |       |    |    |    |       |    |     |    |            | 100   |      |               |       |          |       |         |
| 30 | Mosaic cropland (>50%) / natural vegetation (<50%)        | 5     | 5  |    |    | 5     | 5  | 5   |    | 15         | 60    |      |               |       |          |       |         |
| 40 | Mosaic natural vegetation (>50%) / cropland (<50%)        | 5     | 5  |    |    | 7.5   | 10 | 7.5 |    | 25         | 40    |      |               |       |          |       |         |
| 50 | Tree cover, broadleaved, evergreen, closed to open (>15%) | 90    |    |    |    | 5     | 5  |     |    |            |       |      |               |       |          |       |         |
| 60 | Tree cover, broadleaved, deciduous, closed to open (>15%) |       | 50 |    |    |       | 20 |     |    | 30         |       |      |               |       |          |       |         |
| 61 | Tree cover, broadleaved, deciduous, closed (>40%)         |       | 70 |    |    |       | 15 |     |    | 15         |       |      |               |       |          |       |         |
| 62 | Tree cover, broadleaved, deciduous, open (15-40%)         |       | 30 |    |    |       | 25 |     |    | 45         |       |      |               |       |          |       |         |

|     |                                                               |          |           |          |          |           |           |          |    |
|-----|---------------------------------------------------------------|----------|-----------|----------|----------|-----------|-----------|----------|----|
| 70  | Tree cover, needleleaved,<br>evergreen, closed to open (>15%) | 50       | 2.5       | 2.5      | 15       | 30        |           |          |    |
| 71  | Tree cover, needleleaved,<br>evergreen, closed (>40%)         | 70       | 5         | 5        | 5        | 15        |           |          |    |
| 72  | Tree cover, needleleaved,<br>evergreen, open (15-40%)         | 30       |           |          | 25       | 45        |           |          |    |
| 80  | Tree cover, needleleaved,<br>deciduous, closed to open (>15%) | 50       | 2.5       | 2.5      | 2.5      | 12.5      | 30        |          |    |
| 81  | Tree cover, needleleaved,<br>deciduous, closed (>40%)         | 70       | 5         | 5        | 5        | 15        |           |          |    |
| 82  | Tree cover, needleleaved,<br>deciduous, open (15-40%)         | 30       |           |          | 25       | 45        |           |          |    |
| 90  | Tree cover, mixed leaf type<br>(broadleaved and needleleaved) | 30       | 20        | 10       | 5        | 5         | 5         | 25       |    |
| 100 | Mosaic tree and shrub (>50%) /<br>herbaceous cover (<50%)     | <b>7</b> | <b>15</b> | <b>4</b> | <b>5</b> | <b>8</b>  | <b>15</b> | <b>6</b> | 40 |
| 110 | Mosaic herbaceous cover (>50%)<br>/ tree and shrub (<50%)     | <b>4</b> | <b>7</b>  | <b>4</b> | <b>6</b> | <b>13</b> | <b>6</b>  | 60       |    |
| 120 | Shrubland                                                     |          | 15        | 30       | 15       | 40        |           |          |    |
| 121 | Shrubland evergreen                                           |          | 30        |          | 30       | 40        |           |          |    |
| 122 | Shrubland deciduous                                           |          |           | 60       |          | 40        |           |          |    |
| 130 | Grassland                                                     |          |           |          |          | 100       |           |          |    |

|     |                                                                |      |      |     |           |           |           |             |             |             |
|-----|----------------------------------------------------------------|------|------|-----|-----------|-----------|-----------|-------------|-------------|-------------|
| 140 | Lichens and mosses                                             |      |      |     | <b>10</b> | <b>70</b> | <b>20</b> |             |             |             |
| 150 | Sparse vegetation (tree, shrub, herbaceous cover) (<15%)       | 4.7  | 4.7  | 3.1 | 4.7       | 4.7       | 3.1       | <b>10.0</b> | <b>45.0</b> | <b>20.0</b> |
| 151 | Sparse tree (<15%)                                             | 9.4  | 9.4  | 6.2 |           |           |           | <b>10.0</b> | <b>45.0</b> | <b>20.0</b> |
| 152 | Sparse shrub (<15%)                                            |      |      |     | 7.5       | 7.5       | 5.0       | <b>15.0</b> | <b>45.0</b> | <b>20.0</b> |
| 153 | Sparse herbaceous cover (<15%)                                 |      |      |     |           |           |           | <b>35.0</b> | <b>45.0</b> | <b>20.0</b> |
| 160 | Tree cover, flooded, fresh or brakish water                    | 37.5 | 37.5 |     |           |           |           | 25          |             |             |
| 170 | Tree cover, flooded, saline water                              | 75   |      |     | 25        |           |           |             |             |             |
| 180 | Shrub or herbaceous cover, flooded, fresh/saline/brakish water |      |      |     | 25        | 15        |           | <b>30</b>   | <b>30</b>   |             |
| 190 | Urban areas                                                    |      |      |     |           |           |           |             |             | 100         |
| 200 | Bare areas                                                     |      |      |     |           |           |           |             |             | 100         |
| 201 | Consolidated bare areas                                        |      |      |     |           |           |           |             |             | 100         |
| 202 | Unconsolidated bare areas                                      |      |      |     |           |           |           |             |             | 100         |
| 210 | Water bodies                                                   |      |      |     |           |           |           |             |             | 100         |
| 220 | Permanent snow and ice                                         |      |      |     |           |           |           |             |             | 100         |

BE : Broadleaf Evergreen, BD : Broadleaf Deciduous, NE : Needleleaf Evergreen and ND : Needleleaf Deciduous.

Bold: modified values for the introduction of new boreal vegetation (i.e., shrubs, NVPs and cold climate grass PFTs)

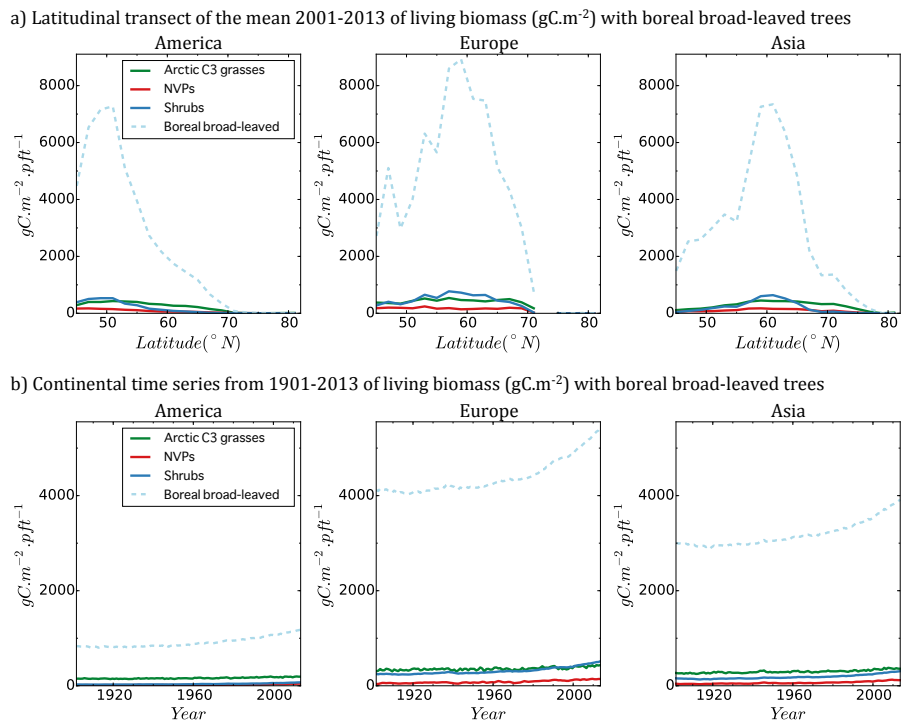

**Figure S1: Latitudinal transects of the mean 2001-2013 (from  $45^{\circ}\text{N}$ ) and time series from 1901 to 2013 (from  $55^{\circ}\text{N}$ ) of total summer live biomass of new PFTs (cold climate C3 grasses, NVPs and boreal shrubs) and boreal broad-leaved tree (dashed).**

5
